# Supplementary material for: Phenotypic and genetic features of a novel clinically isolated rough morphotype Candida auris
Source: Front Microbiol. 2023 Jun 7;14:1174878. doi: 10.3389/fmicb.2023.1174878 (PMC10282645; doi:10.3389/fmicb.2023.1174878)
Supplement: Supplementary file 2 [file Data_Sheet_2.xlsx]

## Sheet: Sheet1
ID	A112_1	A112_2	A112_3	A114_1	A114_2	A114_3	A1_1	A1_2	A1_3	Swissprot	C. albicans ORF (22nd)	C. albicans gene name
CJI97_000438_RHD3_PGA31	0.606912	1.40785	0.0932227	0.244749	0.31986	0.953414	-0.872981	-1.28158	-1.47145	sp|Q5A5U4|RHD3_CANAL Cell wall protein RHD3 OS=Candida albicans (strain SC5314 / ATCC MYA-2876) OX=237561 GN=RHD3 PE=1 SV=1	CaO19.5302	PGA31
CJI97_000800_CaO19.3869	-0.4675	-0.849536	-0.594009	-0.574018	-0.547151	-0.488318	0.561859	0.722038	2.23664	-	CaO19.3869	CaO19.3869
CJI97_000842_FGR41	-0.671405	-0.635277	-0.668042	-0.658231	-0.681503	-0.662463	1.1585	1.25282	1.5656	-	CaO19.4910	FGR41
CJI97_001077_LAC12	-0.622882	-0.622882	-0.622882	-0.622882	-0.622882	-0.622882	0.943316	2.05998	0.734003	sp|P07921|LACP_KLULA Lactose permease OS=Kluyveromyces lactis (strain ATCC 8585 / CBS 2359 / DSM 70799 / NBRC 1267 / NRRL Y-1140 / WM37) OX=284590 GN=LAC12 PE=3 SV=1
CJI97_001078_LAC12	-0.59279	-0.59279	-0.59279	-0.59279	-0.59279	-0.59279	2.22273	0.491949	0.842059	sp|P07921|LACP_KLULA Lactose permease OS=Kluyveromyces lactis (strain ATCC 8585 / CBS 2359 / DSM 70799 / NBRC 1267 / NRRL Y-1140 / WM37) OX=284590 GN=LAC12 PE=3 SV=1
CJI97_001079_PUL2	-0.623675	-0.623675	-0.411759	-0.623675	-0.623675	-0.623675	0.258109	1.15335	2.11867	sp|Q6CSN2|PUL2_KLULA Cytochrome P450 monooxygenase PUL2 OS=Kluyveromyces lactis (strain ATCC 8585 / CBS 2359 / DSM 70799 / NBRC 1267 / NRRL Y-1140 / WM37) OX=284590 GN=PUL2 PE=3 SV=1
CJI97_001080_YNR063W	-0.642665	-0.642665	-0.642665	-0.642665	-0.642665	-0.642665	1.2821	0.755137	1.81876	sp|P53749|YN92_YEAST Uncharacterized transcriptional regulatory protein YNR063W OS=Saccharomyces cerevisiae (strain ATCC 204508 / S288c) OX=559292 GN=YNR063W PE=1 SV=1
CJI97_001081_PUL3	-0.64475	-0.64475	-0.64475	-0.64475	-0.64475	-0.64475	1.43719	0.723402	1.70791	sp|Q6CSN0|PUL3_KLULA MFS-type transporter PUL3 OS=Kluyveromyces lactis (strain ATCC 8585 / CBS 2359 / DSM 70799 / NBRC 1267 / NRRL Y-1140 / WM37) OX=284590 GN=PUL3 PE=3 SV=1
CJI97_001082_PUL1	-0.544779	-0.68407	-0.68407	-0.68407	-0.68407	-0.68407	1.06845	1.56343	1.33326	sp|Q6CSN3|PUL1_KLULA Probable cyclodipeptide synthase PUL1 OS=Kluyveromyces lactis (strain ATCC 8585 / CBS 2359 / DSM 70799 / NBRC 1267 / NRRL Y-1140 / WM37) OX=284590 GN=PUL1 PE=4 SV=1
CJI97_001083_ARN1_SIT1	-0.561111	-0.561111	-0.561111	-0.561111	-0.561111	-0.561111	1.92488	-0.105664	1.54745	sp|P38731|ARN1_YEAST Siderophore iron transporter ARN1 OS=Saccharomyces cerevisiae (strain ATCC 204508 / S288c) OX=559292 GN=ARN1 PE=1 SV=1	CaO19.2179	SIT1
CJI97_001084	-0.604654	-0.604654	-0.604654	-0.604654	-0.604654	-0.604654	1.93587	1.40604	0.286007	-
CJI97_001085_ARN1_SIT1	-0.628019	-0.628019	-0.628019	-0.628019	-0.628019	-0.628019	1.33754	0.54794	1.88263	sp|P38731|ARN1_YEAST Siderophore iron transporter ARN1 OS=Saccharomyces cerevisiae (strain ATCC 204508 / S288c) OX=559292 GN=ARN1 PE=1 SV=1	CaO19.2179	SIT1
CJI97_001086_SAP2	-0.617112	-0.617112	-0.617112	-0.617112	-0.617112	-0.617112	0.698583	0.904244	2.09985	sp|C4YMJ3|CARP2_CANAW Candidapepsin-2 OS=Candida albicans (strain WO-1) OX=294748 GN=SAP2 PE=1 SV=1	CaO19.3708	SAP
CJI97_001087	-0.595334	-0.595334	-0.595334	-0.595334	-0.595334	-0.595334	0.524055	0.83338	2.21457	-
CJI97_001088_MNN1	-0.641971	-0.641971	-0.641971	-0.641971	-0.641971	-0.641971	1.63948	1.54895	0.663391	sp|Q5AGA0|MNN1_CANAL Putative alpha-1,3-mannosyltransferase MNN1 OS=Candida albicans (strain SC5314 / ATCC MYA-2876) OX=237561 GN=MNN1 PE=2 SV=1	CaO19.4279	MNN1
CJI97_001195_LUC7_PGA38	-0.583276	-0.535879	-0.767366	-0.568355	-0.680331	-0.612491	0.876617	0.830256	2.04082	sp|Q07508|LUC7_YEAST Protein LUC7 OS=Saccharomyces cerevisiae (strain ATCC 204508 / S288c) OX=559292 GN=LUC7 PE=1 SV=1	CaO19.2758	PGA38
CJI97_001373	1.02301	0.400759	0.362958	0.871627	-0.0466427	0.850168	-0.269148	-1.53638	-1.65635	-
CJI97_001762_ARN1_SIT1	0.798878	0.735557	0.189451	-0.0956273	-0.270348	1.70377	-0.835478	-0.554621	-1.67158	sp|P38731|ARN1_YEAST Siderophore iron transporter ARN1 OS=Saccharomyces cerevisiae (strain ATCC 204508 / S288c) OX=559292 GN=ARN1 PE=1 SV=1	CaO19.2179	SIT1
CJI97_001771	-0.599282	-0.690011	-0.50316	-0.633845	-0.39677	-0.647634	0.117856	1.29024	2.06261	-
CJI97_001780_LAC12	-0.658852	-0.658852	-0.658852	-0.658852	-0.658852	-0.658852	1.62125	1.32124	1.01063	sp|P07921|LACP_KLULA Lactose permease OS=Kluyveromyces lactis (strain ATCC 8585 / CBS 2359 / DSM 70799 / NBRC 1267 / NRRL Y-1140 / WM37) OX=284590 GN=LAC12 PE=3 SV=1
CJI97_001781_CEP3	-0.655325	-0.655325	-0.655325	-0.655325	-0.655325	-0.655325	1.69444	0.962299	1.27521	sp|P40969|CBF3B_YEAST Centromere DNA-binding protein complex CBF3 subunit B OS=Saccharomyces cerevisiae (strain ATCC 204508 / S288c) OX=559292 GN=CEP3 PE=1 SV=1
CJI97_001782_LAC12	-0.622534	-0.549021	-0.622534	-0.622534	-0.622534	-0.573767	0.745393	0.674753	2.19278	sp|P07921|LACP_KLULA Lactose permease OS=Kluyveromyces lactis (strain ATCC 8585 / CBS 2359 / DSM 70799 / NBRC 1267 / NRRL Y-1140 / WM37) OX=284590 GN=LAC12 PE=3 SV=1
CJI97_001783_BGLI	-0.655816	-0.655816	-0.655816	-0.599398	-0.655816	-0.655816	1.8029	0.830672	1.24491	sp|B0Y3M6|BGLI_ASPFC Probable beta-glucosidase I OS=Neosartorya fumigata (strain CEA10 / CBS 144.89 / FGSC A1163) OX=451804 GN=bglI PE=3 SV=1
CJI97_001784_ARN1_SIT1	-0.658884	-0.670915	-0.631229	-0.655127	-0.657341	-0.629215	1.07675	1.02076	1.8052	sp|P38731|ARN1_YEAST Siderophore iron transporter ARN1 OS=Saccharomyces cerevisiae (strain ATCC 204508 / S288c) OX=559292 GN=ARN1 PE=1 SV=1
CJI97_001786_GIT3	-0.617141	-1.06819	-0.588562	-0.537357	-0.499039	-0.556011	1.43599	0.848068	1.58224	sp|Q5A1L6|GIT3_CANAL Major glycerophosphoinositol permease GIT3 OS=Candida albicans (strain SC5314 / ATCC MYA-2876) OX=237561 GN=GIT3 PE=1 SV=1	orf19.1979	GIT3
CJI97_002126_ALS5	0.874502	1.29206	0.48983	0.828696	-0.304401	0.227671	-0.566593	-1.1603	-1.68147	sp|Q5A8T7|ALS5_CANAL Agglutinin-like protein 5 OS=Candida albicans (strain SC5314 / ATCC MYA-2876) OX=237561 GN=ALS5 PE=1 SV=2
CJI97_002130_ARN1_SIT1	-0.0981764	-0.695041	-0.656874	-0.745589	-0.619574	-0.700203	1.25473	0.259746	2.00098	sp|P38731|ARN1_YEAST Siderophore iron transporter ARN1 OS=Saccharomyces cerevisiae (strain ATCC 204508 / S288c) OX=559292 GN=ARN1 PE=1 SV=1
CJI97_002470_SOU2	-0.559797	-0.661231	0.0712341	-0.7802	-0.590783	-0.680129	-0.112259	1.25479	2.05838	sp|P87218|SOU2_CANAL Sorbose reductase homolog SOU2 OS=Candida albicans (strain SC5314 / ATCC MYA-2876) OX=237561 GN=SOU2 PE=3 SV=3	CaO19.2897	SOU2
CJI97_002713_QUTD_HGT17	-0.909357	-0.773541	-0.147801	-0.517635	-0.380713	-0.297662	-0.394092	1.8606	1.5602	sp|B0XQS8|QUTD_ASPFC Probable quinate permease OS=Neosartorya fumigata (strain CEA10 / CBS 144.89 / FGSC A1163) OX=451804 GN=qutD PE=3 SV=1	CaO19.4682	HGT17
CJI97_003095	-0.985568	-0.952186	-0.806052	-0.590742	-0.253104	-0.274327	1.24106	1.37808	1.24283	-	CaO19.113	CIP1
CJI97_003192_SCW11	-0.675435	-0.609608	-0.59398	-0.598848	-0.675713	-0.655766	0.680133	1.23632	1.89289	sp|P53189|SCW11_YEAST Probable family 17 glucosidase SCW11 OS=Saccharomyces cerevisiae (strain ATCC 204508 / S288c) OX=559292 GN=SCW11 PE=1 SV=1	CaO19.3893	SCW11
CJI97_003389_RBE1	-0.592881	-0.586702	-0.592578	-0.594886	-0.604793	-0.588399	0.750942	0.574811	2.23449	sp|Q59ZX3|RBE1_CANAL Repressed by EFG1 protein 1 OS=Candida albicans (strain SC5314 / ATCC MYA-2876) OX=237561 GN=RBE1 PE=1 SV=1	CaO19.7218	RBE1
CJI97_003700_HSP21	1.2284	0.792613	-0.139041	1.0223	-0.00763606	0.517854	-0.497254	-1.34085	-1.57639	sp|Q5AHH4|HSP21_CANAL Small heat shock protein 21 OS=Candida albicans (strain SC5314 / ATCC MYA-2876) OX=237561 GN=HSP21 PE=1 SV=1	CaO19.822	HSP21
CJI97_004165_ARN1_SIT1	1.21814	1.15084	0.200996	0.492925	-0.0226161	0.634236	-1.1998	-1.2818	-1.19292	sp|P38731|ARN1_YEAST Siderophore iron transporter ARN1 OS=Saccharomyces cerevisiae (strain ATCC 204508 / S288c) OX=559292 GN=ARN1 PE=1 SV=1	CaO19.2179	SIT1
CJI97_004166	-0.571136	-0.44766	1.10079	0.88939	0.365088	1.58111	-0.972529	-0.972529	-0.972529	-
CJI97_004167	-0.634186	-0.634186	-0.634186	-0.634186	-0.634186	-0.634186	1.80828	0.596367	1.40047	-
CJI97_004175_ALS1	-0.234246	0.0426341	-0.706462	-0.900915	-1.00016	-0.936969	1.35678	1.39324	0.986101	sp|Q5A8T4|ALS1_CANAL Agglutinin-like protein 1 OS=Candida albicans (strain SC5314 / ATCC MYA-2876) OX=237561 GN=ALS1 PE=1 SV=1	CaO19.4555	ALS4
CJI97_004240_LIP10	-0.391956	-0.441847	1.06424	0.757065	0.565055	1.55201	-1.06017	-1.06492	-0.979469	sp|Q9P4E5|LIP10_CANAL Lipase 10 OS=Candida albicans (strain SC5314 / ATCC MYA-2876) OX=237561 GN=LIP10 PE=3 SV=1	CaO19.4822	LIP10
CJI97_004264	0.214025	0.64302	-0.130089	1.08533	0.594041	1.10314	-0.530925	-1.31855	-1.66	-
CJI97_004546	0.65264	1.05501	1.03273	0.351761	-0.0395489	0.48764	-0.582559	-1.08003	-1.87765	-
CJI97_004552	1.85894	0.43616	-0.0290335	0.654241	-0.0951791	0.105093	-0.147629	-1.31404	-1.46855	-
CJI97_004554	0.488594	1.03545	0.182093	1.02037	0.648533	0.455928	-1.05766	-1.49168	-1.28163	-
CJI97_004906_TRX1	0.859569	0.934482	0.0272513	0.806335	0.382787	0.48599	-0.415131	-1.0744	-2.00688	sp|P22217|TRX1_YEAST Thioredoxin-1 OS=Saccharomyces cerevisiae (strain ATCC 204508 / S288c) OX=559292 GN=TRX1 PE=1 SV=3
CJI97_004975_RHD3_PGA31	0.856816	1.08995	0.414226	0.140876	0.584847	0.593591	-0.591958	-1.35352	-1.73483	sp|Q5A5U4|RHD3_CANAL Cell wall protein RHD3 OS=Candida albicans (strain SC5314 / ATCC MYA-2876) OX=237561 GN=RHD3 PE=1 SV=1	CaO19.5302	PGA31
CJI97_005071	0.658726	0.368363	0.778351	0.438188	0.950677	0.721373	-1.12864	-1.2342	-1.55284	-
CJI97_005155_DSE1	-0.626344	-0.600145	-0.63956	-0.521604	-0.667531	-0.580701	0.695378	0.771411	2.1691	sp|Q6BT42|DSE1_DEBHA Protein DSE1 OS=Debaryomyces hansenii (strain ATCC 36239 / CBS 767 / BCRC 21394 / JCM 1990 / NBRC 0083 / IGC 2968) OX=284592 GN=DSE1 PE=3 SV=2	CaO19.3629	DSE1
CJI97_005648_DAL5	1.25782	1.23866	0.664369	0.198749	0.0679298	0.189943	-1.20582	-1.20582	-1.20582	sp|P15365|DAL5_YEAST Allantoate permease OS=Saccharomyces cerevisiae (strain ATCC 204508 / S288c) OX=559292 GN=DAL5 PE=1 SV=1
CJI97_005649_HYR3_IFF2	0.325373	0.68249	1.47024	0.259503	0.320888	0.673558	-1.24402	-1.24402	-1.24402	sp|Q59XA7|HYR3_CANAL Hyphally regulated cell wall protein 3 OS=Candida albicans (strain SC5314 / ATCC MYA-2876) OX=237561 GN=HYR3 PE=1 SV=1
CJI97_005650	1.11027	0.76348	0.749723	0.525338	0.15827	0.566177	-1.29109	-1.29109	-1.29109	-
CJI97_005708	-1.14671	-0.379527	-0.97789	-1.19679	0.724232	-0.0895908	0.464198	1.20351	1.39857	-
